# Supplementary material for: Impact of Mediterranean Diet on Lipid Composition in the Colaus-PsyColaus Study
Source: MDPI journal article supplement (doi:10.3390/nu15214659), 2023-11-03
Supplement: s1 [file s1]

## Supplementary information

**Table S1.** Characteristics of included and excluded participants at first follow-up, 2009-2012, CoLaus|PsyCoLaus study, Lausanne, Switzerland.

|                                           | Included     | Excluded    | P-value |
|-------------------------------------------|--------------|-------------|---------|
| Total                                     | 4,249 (83.9) | 815 (16.1)  |         |
| Woman (%)                                 | 2,280 (53.7) | 427 (52.4)  | 0.507   |
| Age (years)                               | 57.6 ± 10.5  | 58.5 ± 10.8 | 0.031   |
| Swiss born (%)                            | 2,770 (65.2) | 414 (50.8)  | <0.001  |
| Educational level (%)                     |              |             | <0.001  |
| High                                      | 941 (22.1)   | 138 (17.1)  |         |
| Middle                                    | 1,143 (26.9) | 163 (20.1)  |         |
| Low                                       | 2,165 (51.0) | 509 (62.8)  |         |
| Living alone (%)                          | 1,763 (41.5) | 439 (53.9)  | <0.001  |
| Smoking status (%)                        |              |             | <0.001  |
| Never                                     | 1,745 (41.1) | 290 (38.3)  |         |
| Former                                    | 1,634 (38.4) | 249 (32.8)  |         |
| Current                                   | 870 (20.5)   | 219 (28.9)  |         |
| Body mass index (kg/m <sup>2</sup> )      | 26.0 ± 4.5   | 27.3 ± 5.2  | <0.001  |
| BMI categories (%)                        |              |             | <0.001  |
| Normal (< 25 kg/m <sup>2</sup> )          | 1,914 (45.0) | 266 (35.5)  |         |
| Overweight (25.0-29.9 kg/m <sup>2</sup> ) | 1,657 (39.0) | 303 (40.4)  |         |
| Obese (≥ 30.0 kg/m <sup>2</sup> )         | 678 (16.0)   | 181 (24.1)  |         |
| Hypertension (%)                          | 1,718 (40.4) | 378 (47.0)  | 0.001   |
| Diabetes (%)                              | 411 (9.7)    | 128 (16.1)  | <0.001  |
| Mediterranean diet score                  |              |             |         |
| Trichopoulou                              | 4.0 ± 1.5    | 3.4 ± 1.3   | <0.001  |
| Vormund                                   | 4.7 ± 1.9    | 3.1 ± 2.0   | <0.001  |

BMI, Body mass index. Results are expressed as number of participants (column %) or as average ± standard deviation. Hypertension was defined as ≥140/90 mm Hg or presence of an antihypertensive drug treatment; diabetes was defined as fasting plasma glucose ≥7.0 mmol/l or presence of an antidiabetic drug treatment. **Between-group comparisons performed using ANOVA.**

**Table S2.** Multivariable analysis of the associations between the Mediterranean diet scores and lipid levels at baseline, stratified by hypolipidemic drug treatment, CoLaus/PsyCoLaus study, Lausanne, Switzerland.

|                              | Trichopoulou | P-value | Vormund | P-value |
|------------------------------|--------------|---------|---------|---------|
| Untreated ( <i>n</i> =3,485) |              |         |         |         |
| Total cholesterol            | 0.000        | 0.986   | -0.019  | 0.265   |
| LDL cholesterol              | -0.016       | 0.350   | -0.029  | 0.088   |
| HDL cholesterol              | 0.037        | 0.011   | 0.041   | 0.005   |
| Triglycerides                | -0.010       | 0.512   | -0.041  | 0.011   |
| Treated ( <i>n</i> =764)     |              |         |         |         |
| Total cholesterol            | -0.073       | 0.108   | -0.057  | 0.109   |
| LDL cholesterol              | -0.079       | 0.027   | -0.063  | 0.078   |
| HDL cholesterol              | 0.030        | 0.361   | -0.014  | 0.668   |
| Triglycerides                | -0.046       | 0.194   | 0.005   | 0.895   |

Results are expressed as multivariable-adjusted beta coefficients. Statistical analysis by linear regression adjusting for gender (man, woman), age (continuous), education (low, middle, high), marital status (living alone, living in couple), smoking categories (never, former, current), BMI categories (normal, overweight, obese), hypertension (yes, no), and diabetes (yes, no).
